# Supplementary material for: Heritable CRISPR-Cas9 editing of plant genomes using RNA virus vectors
Source: PubMed Central journal article supplement — STAR Protoc. 2023 Feb 9;4(1):102091. doi: 10.1016/j.xpro.2023.102091 (PMC9943877; doi:10.1016/j.xpro.2023.102091), 2023-02-09
Supplement: mmc1.pdf [file mmc1.pdf]

GCGCCGAGTTCCTTAGAAGGAATCCCACTTTGGTACCCTCGGATGAGAAGAGAAAGCTGTACATGGGCACCAGGGAGGAATGACACGTTACACATAC  
GCTGGATGCCAGGGGCTAACTAAGCCGAAGGTACAAATAGTGTGGACCACAACACCCAAGTGTGTAGCGCGAATGTGATGTACACGGCACTTTC  
TAGAGCCACCGATAGGATTCACCTCGTGAACACAAGTGCAAATTCCTGGCCCTTCTGGGAAAAGTTGGACAGCACCCCTTACCTCAAGACTTTC  
TATCAGTGGTGAGAGAACAAGCACTCAGGGAGTACGAGCCGGCAGAGGCAGAGCCAATTCAAGAGCCTGAGCCCCAGACACACATGTGTGTCGAG  
AATGAGGAGTCCGTGCTAGAAGAGTACAAGAGGAACCTTTGGAAAAGTTTGACAGAGAGATCCACTCTGAATCCCATTGGTCATTCAAACCTGTGT  
CCAAACTGAAGACACAACCACTTCAGTTGTTTTCGCATCAACAAGCAAAAGATGAGACCCCTCCTCTGGGCGACTATAGATGCGCGGCTCAAGACCA  
GCAATCAAGAGACAACCTTCAGAGAATTCCTGAGCAAGAAGGACATTGGGGACGTTCTGTTTTTAAACTACCAAAAAGCTATGGGTTTACCCTAAA  
GAGCGTATTCCTTTTTCCCAAGAGGTCTGGGAAGCTTGTGCCACGAAGTACAAGCAAGTACCTCAGCAAGTCAAAGTGAACCTTGATCAATGG  
GACTGTGAGACAGAGCCAGACTTCGATGAAAATAAGATTATGGTATTCCTCAAGTCGAGTGGGTACAAAAGGTGGAAAACCTAGGTCTACCCA  
AGATTAAGCCAGGTCAAACCATAGCAGCCTTTTACCAGCAGACTGTGATGCTTTTTGGAACCTATGGCTAGGTACATGCGATGGTTACAGACAGGCT  
TTCCAGCCAAAAGAAGTCTTCATAAACTGTGAGACCAGCCAGATGACATGTCTGCATGGGCCCTGAACAACCTGGAATTTACAGCAGACCTAGCTT  
GGCTAATGACTACACAGCTTTCGACCAGTCTCAGGATGGAGCCATGTTGCAATTTGAGGTGCTCAAAGCCAAAACCACTGCATACCCAGAGGAAA  
TCATTCAGGCATACATAGATATTAAGACTAATGCACAGATTTTCTTAGCCAGCTTATCAATTATGCGCCTGACTGGTGAAGTCCCCTTTTGAT  
GCAAACTGAGTGAACATAGCTTACACCCATACAAAGTTTGACATCCCAGCCGGAACTGCTCAAGTTTATGCAAGGAGACGACTCCGCACTGGA  
CTGTGTTCCAGAAGTGAAGCACTAGTTTCCACAGGCTTGGAGCAAAATTAATCCTAAAGTCAAAGCCTGTAATCACGCAGCAAAAAGAGGGCAGTT  
GGCCTGAGTTTTGTGGTTGGCTGATCACCCAAAAGGGGTGATGAAAGACCAATTAAGCTCCATGTTAGCTTAAAATTGGCTGAAGCTAAGGGT  
GAACTCAAGAAATGTCAAGATTCTATGAAATGATCTGAGTTATGCCTATGACCACAAGGACTCTCTGCATGACTTGTTCGATGAGAAAACAGTG  
TCAGGCACACACTCACTTGAGAACACTAATCAAGTCAGGGAGAGGCACTGTCTCACTTTCCCGCTCAGAAACTTCTTTAACCGTTAAGTT  
ACCTTAGAGATTTGAATAAGATGGATATTCATCAGTAGTTTGAAGTTTAGGTTATTCTAGGACTTCCAATCTTTAGATTACAGACCTTTG  
GTAGTACATGCAGTAGCCGGAGCCGTAAGTCCACAGCCTAAGGAAGTTGATCCTCAGACACCCAACTTACCCTGCATACACTCGGTGTCCTC  
TGACAAGGTGAGTATCAGAACTAGAGGCATACAGAAGCCAGGACCTATTCCTGAGGGCAACTTCGCAATCCTCGATGAGTATACTTTGGACAACA  
CCACAAGGAACTCATAACAGGCACTTTTTGCTGACCCCTATCAGGCACCCGAGTTTAGCCTAGAGCCCCACTTCTACTTGGAAAACATCATTTCGA  
GTTCCGAGGAAAGTGGCAGATTTGATAGCTGGCTGTGGCTTCGATTTTCGAGACCAACTCACCGGAAGAAGGGCACTTAGAGATCACTGGCATAAT  
CAAAGGGCCCCCTACTCGGAAAAGTGATAGCCATTGATGAGGAGTCTGAGACAACACTGTCCAGGCATGGTGTGAGTTTGTAAAGCCCTGCCAAG  
TGACGGGACTTGAGTTCAAAGTAGTCACTATTGTGCTGCCGCACCAATAGAGGAAATGGCCAGTCCACAGCTTTCTACAACGCTATCACCAGG  
TCAAAGGGATTGACATATGTCCGCGCAGGGCCATAGGCTGACCGCTCCGGTCAATTCGAAAAGTGTACATAGTATTAGGTCTATCATTGCTT  
TAGTTTCAATTACCTTTCTGCTTTCTAGAAATAGCTTACCCACGTCGGTGACAACATTCACAGCTTGCCACACGGAGGAGCTTACAGAGACGGC  
ACCAAAAGCAATCTGTACAACTCCCCAAATCTAGGGTCACGAGTGTCTACACAACGGAAGAACGCAGCATTTGCTGCCGTTTTGCTACTGAC  
TTTGCTGATCTATGGAAGTAAATACATATCTCAACGCAATCATACTTGTGCTTGTGGTAACAATCATAGCAGTCATTAGCACTTCTTAGTGAGG  
ACTGAACCTTGTGTCATCAAGATTACTGGGGAATCAATCACAGTGTGGCTTGCAAACCTAGATGCAGAAAACATAAGGGCCATTGCCGATCTCAA  
GCCACTTCCGTTGAACGGTTAAGTTTCCATTGATACTCGAAAAGATGTCAGCACCAGCTAGCACAACACAGCCCATAGGGTCAACTACCTCAACT  
ACCACAAAACCTGCAGGCGCAACTCCTGCCACAGCTTACGGCTGTTCACTATCCCGGATGGGGATTCTTTTAGTACAGCCCGTCCCATAGTAGC  
CAGCAATGCTGTGCAACAACATGAGGACCTCAGCAAGATTGAGGCTATTTGGAAGGACATGAAGGTGCCACAGACACTATGGCACAGGCTGCTT  
GGGACTTAGTACAGACTGTGCTGATGAGGATCATCCGCTCAAACAGAAATGATAGATACAGGTCCCTATTCCAACGGCATCAGCAGAGCTAGA  
CTGGCAGCAGCAATTAAGAGGTGTGCACACTTAGGCAATTTGATGAAGTATGCCCCAGTGGTATGGAACCTGGATGTTAACTAACAACAGTCC  
ACCTGCTAACTGGCAAGCACAAAGTTTTCAAGCCTGAGCACAAATTCGCTGCATTCGACTTCTTCAATGGAGTCACCAACCCAGCTGCCATCATGC  
CCAAAGAGGGGCTCATCCGGCCACCGTCTGAAGCTGAAATGAATGCTGCCAAAACCTGCTGCCTTTGTGAAGATTACAAAGGCCAGGGCAACAATCC  
AACGACTTTGCCAGCCTAGATGCAGCTGTCACTCGAGGTCGTATCACTGGAACAACAACCGCTGAGGCTGTTGTCACTCTACCACCACCAATACT  
ACGCTACATAACCGACGCCTACCCAGTTTCATAGTATTTTCTGGTTGATTGTATGAATAATATAAAT
